# Supplementary material for: Activating photocatalytic hydrogen evolution by constructing Ni-based organic layers and tailoring its crystal facets
Source: Royal Society of Chemistry journal article supplement (doi:10.1039/d3qm00011g), 2023-01-01
Supplement: d3qm00011g1.pdf [file d3qm00011g1.pdf]

## Electronic Supplementary Information

### Activating photocatalytic hydrogen evolution by constructing Ni-based organical layers and tailoring its crystal facets

Zao Wang,<sup>a,b</sup> Man Wang,<sup>c</sup> Jiajia Song,<sup>a,c\*</sup> Jishan Wu,<sup>a,b\*</sup> Zhen Li<sup>a,c,d\*</sup>

<sup>a</sup>Joint School of National University of Singapore and Tianjin University, International Campus of Tianjin University, Binhai New City, Fuzhou 350207, China.

<sup>b</sup>Department of Chemistry, National University of Singapore, Singapore 117543, Singapore. E-mail: chmwuj@nus.edu.sg

<sup>c</sup>Tianjin Key Laboratory of Molecular Optoelectronic Sciences, Department of Chemistry, Institute of Molecular Aggregation Science, Tianjin University, Tianjin 300072, China. E-mail: jjsong@tju.edu.cn

<sup>d</sup>Hubei Key Lab on Organic and Polymeric Optoelectronic Materials, Department of Chemistry, Wuhan University, Wuhan 430072, China. E-mail: lizhen@whu.edu.cn

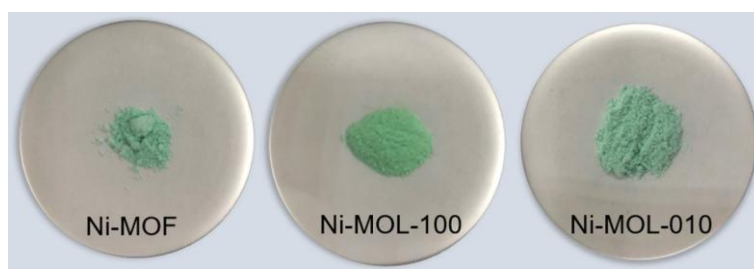

**Figure S1.** The samples of bulky Ni-MOF, Ni-MOL-100 and Ni-MOL-010 from left to right, respectively.

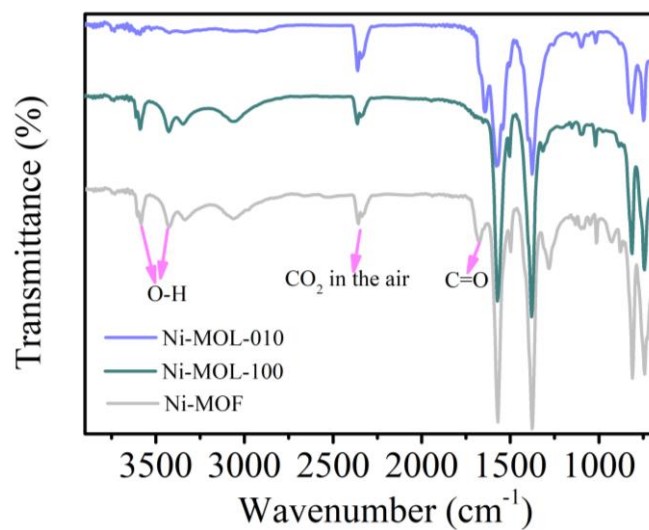

**Figure S2.** Fourier Transform infrared spectroscopy (FT-IR) spectra of bulky Ni-MOF, Ni-MOL-100 and Ni-MOL-010, respectively.

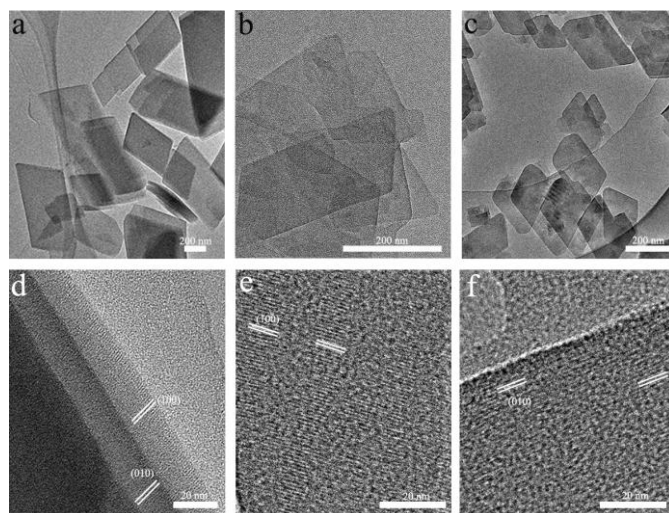

**Figure S3.** TEM images of (a) bulky Ni-MOF, (b) Ni-MOL-100 and (c) Ni-MOL-010, respectively. HRTEM images of (d) bulky Ni-MOF, (e) Ni-MOL-100 and (f) Ni-MOL-010.

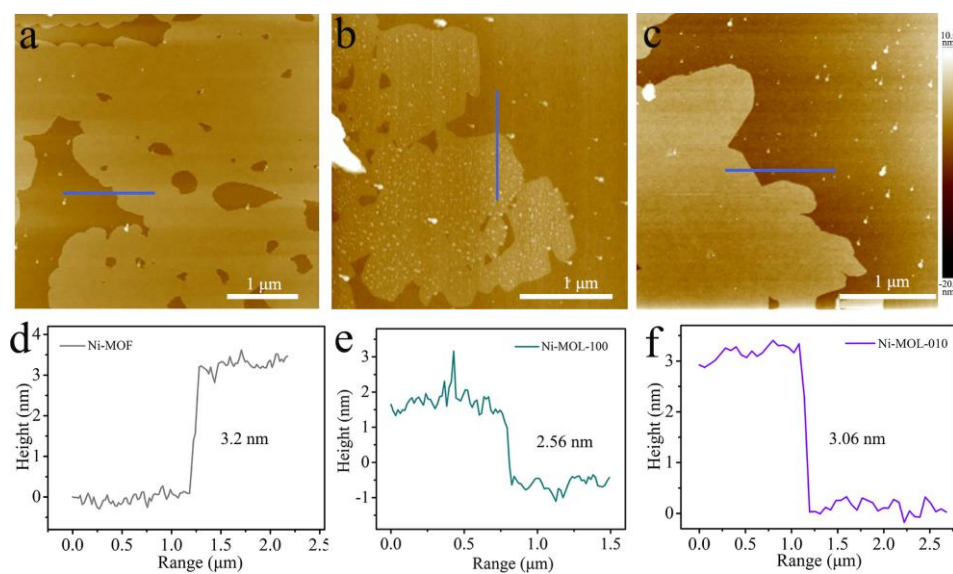

**Figure S4.** AFM results of (a) bulky Ni-MOF, (b) Ni-MOL-100 and (c) Ni-MOL-010. The one on the far right is the ruler bar of the AFM. The thickness of (d) bulky Ni-MOF, (e) Ni-MOL-100 and (f) Ni-MOL-010.

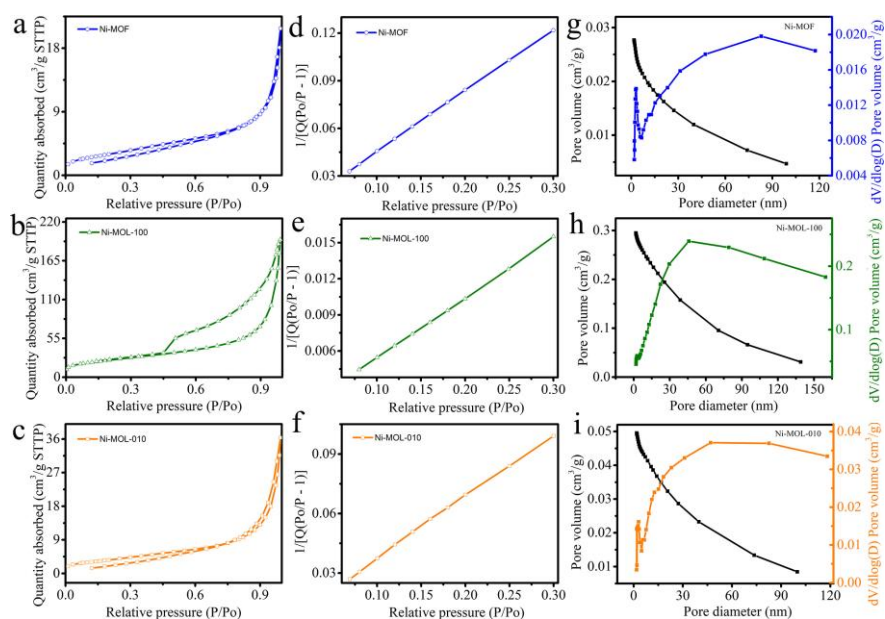

**Figure S5.** Plots of the linear region for the Brunauer-Emmett-Teller (BET) of (a) bulky Ni-MOF, (b) Ni-MOL-100 and (c) Ni-MOL-010. Nitrogen adsorption-desorption isotherms of (d) bulky Ni-MOF, (e) Ni-MOL-100 and (f) Ni-MOL-010. Corresponding non-local density functional theory (NLDFT) pore size distributions (PSD) of (g) bulky Ni-MOF, (h) Ni-MOL-100 and (i) Ni-MOL-010.

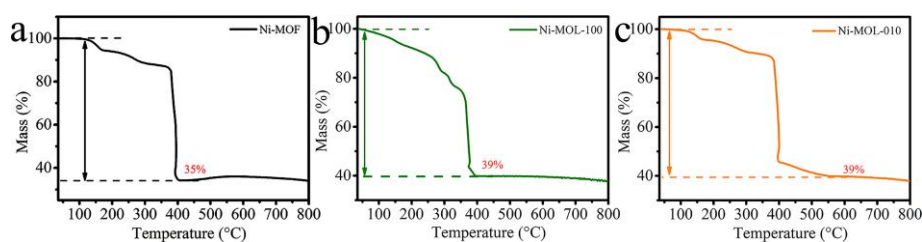

**Figure S6.** Thermal gravimetric analysis (TGA) curves of (a) bulky Ni-MOF, (b) Ni-MOL-100 and (c) Ni-MOL-010 under air atmosphere, respectively.

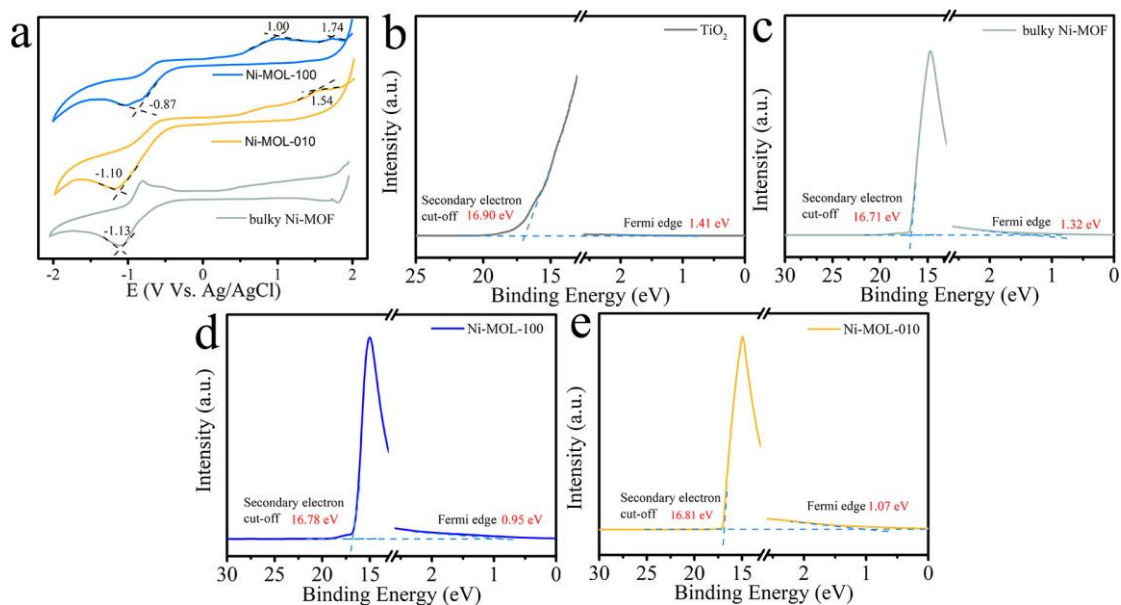

**Figure S7.** (a) Cyclic voltammetry (CV) reduction and oxidation curves of Ni-MOL-100, Ni-MOL-010 and bulky Ni-MOF, respectively. Ultraviolet photoelectron spectroscopy (UPS) spectra showing the Fermi levels of the (b) TiO<sub>2</sub>, (c) bulky Ni-MOF, (d) Ni-MOL-100 and (e) Ni-MOL-010, respectively.

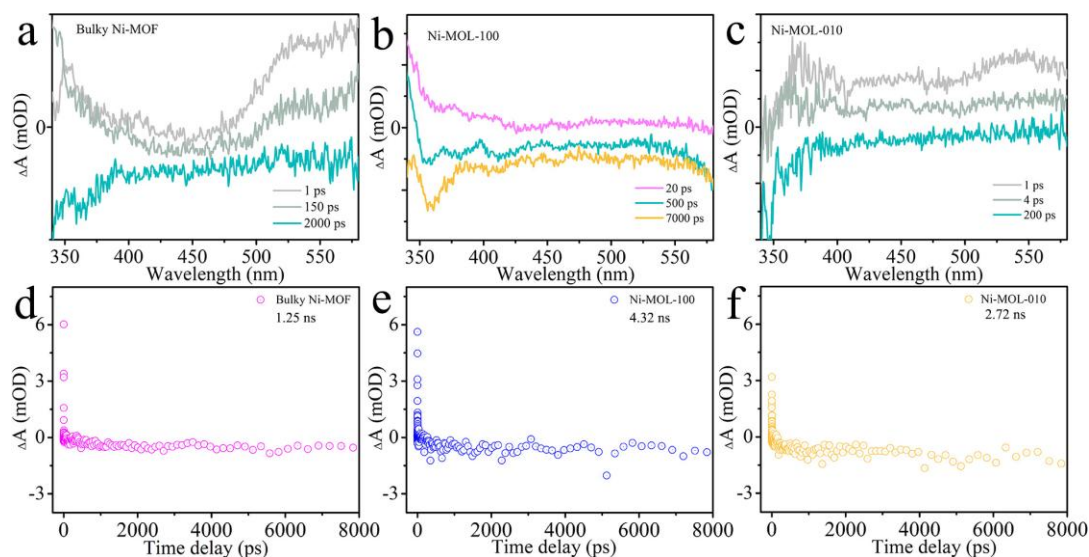

**Figure S8.** Transient absorption spectra of (a) bulky Ni-MOF, (b) Ni-MOL-100, and (c) Ni-MOL-010, respectively. Transient absorption decay profiles of (d) bulky Ni-MOF, (e) Ni-MOL-100 and (f) Ni-MOL-010, respectively.

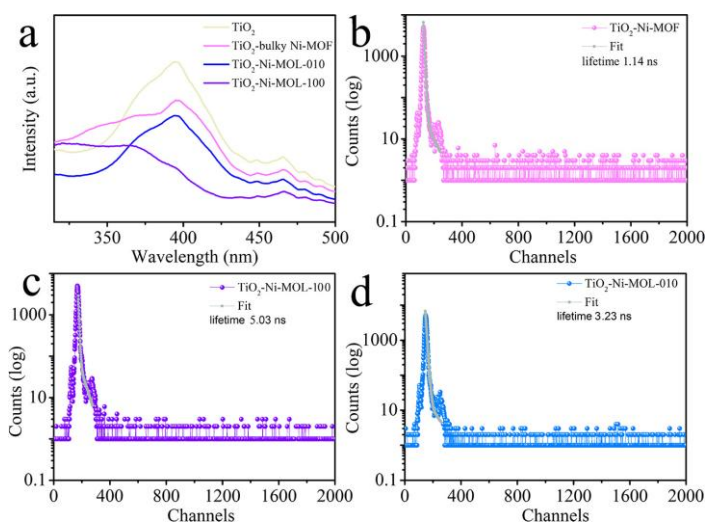

**Figure S9.** The fluorescence of (a)  $\text{TiO}_2$ , mixed  $\text{TiO}_2$ -bulky Ni-MOF, mixed  $\text{TiO}_2$ -Ni-MOL-100 and mixed  $\text{TiO}_2$ -Ni-MOL-010, respectively. Fluorescence decay profiles of (b) mixed  $\text{TiO}_2$ -bulky Ni-MOF, (c) mixed  $\text{TiO}_2$ -Ni-MOL-100 and (d) mixed  $\text{TiO}_2$ -Ni-MOL-010, respectively.

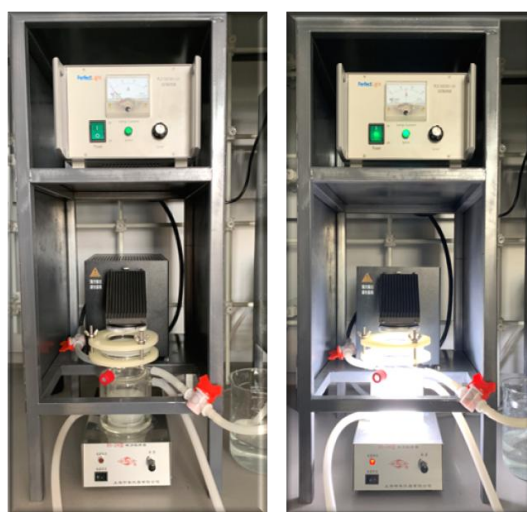

**Figure S10.** The photograph of the reactor setup for hydrogen evolution experiments. Left is under off light; right is under irradiation by 300 W Xenon light (AM 1.5G) under stirring. The photos show excellent dispersibility of Ni-MOLs in water/MeOH mixture.

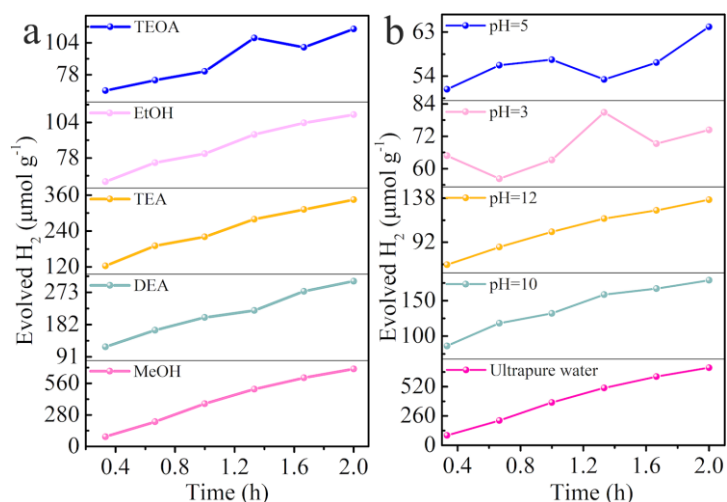

**Figure S11.** (a) Hydrogen evolution arrays using 30 mg  $\text{TiO}_2$  and 5 wt% of Ni-MOL-100 with different sacrificial agents (diethylamine-DEA; triethylamine-TEA; triethanolamine-TEOA). (b) Hydrogen evolution arrays using 30 mg  $\text{TiO}_2$  and 5 wt% of Ni-MOL-100 with different pH values.

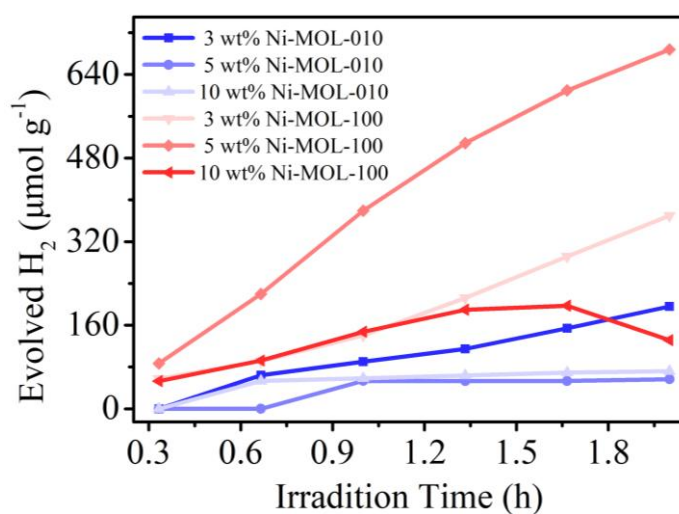

**Figure S12.** The hydrogen evolution arrays in 80 mL  $\text{H}_2\text{O}$  and 20 mL MeOH mixture using 30 mg  $\text{TiO}_2$  and different x wt% of cocatalysts (Ni-MOL-100 and Ni-MOL-010) (x = 3, 5, 10).

**Table S1.** Comparison of recent reports on MOF-based photocatalysts.

| Evolved H <sub>2</sub>             | Light source | Sacrificial agent | $\mu\text{mol g}^{-1} \text{h}^{-1}$ | Reference |
|------------------------------------|--------------|-------------------|--------------------------------------|-----------|
| TiO <sub>2</sub> -Ni-MOL-100       | AM 1.5G      | MeOH              | 343.6                                | This work |
| TiO <sub>2</sub> -Ni-MOL-010       | AM 1.5G      | MeOH              | 25.6                                 | This work |
| TiO <sub>2</sub> -Ni-MOF           | AM 1.5G      | MeOH              | 0                                    | This work |
| NH <sub>2</sub> -MIL-125-Ti        | >380         | TEOA              | 17                                   | 1         |
| NH <sub>2</sub> -MIL-125-Ti        | >420         | TEOA              | 0                                    | 2         |
| RuN <sub>3</sub> /ZIF-67           | >405         | TEOA              | 4.85                                 | 3         |
| CdS/MCM-41                         | >420         | TEOA              | 55.5                                 | 4         |
| NH <sub>2</sub> -UiO-66(Zr)        | >420         | Na <sub>2</sub> S | 0                                    | 5         |
| Pt/NH <sub>2</sub> -UiO-66(Zr)     | >380         | TEOA              | 50.26                                | 6         |
| NH <sub>2</sub> -MIL-125(Ti)(T110) | >400         | TEOA              | 60.8                                 | 7         |

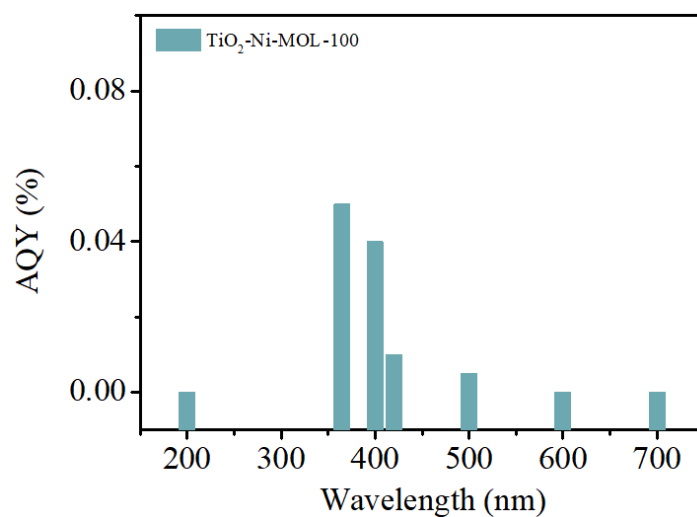**Figure S13.** Wavelength-dependent AQY of photocatalytic hydrogen evolution by mixed TiO<sub>2</sub> with Ni-MOL-100.



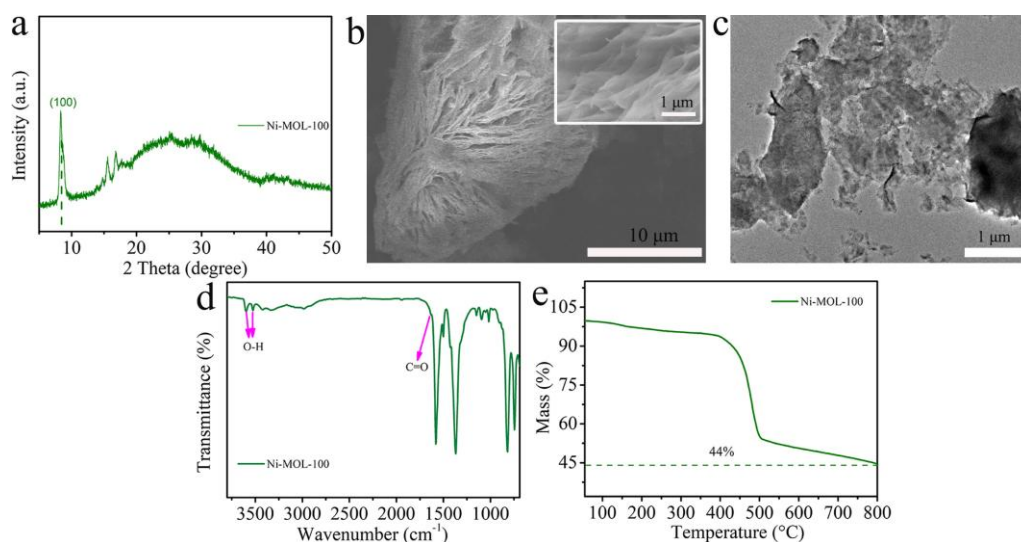

**Figure S14.** (a) PXRD, (b) SEM images, (c) TEM image, (d) FT-IR spectrum, and (e) TGA curve of Ni-MOL-100 as-synthesized after photocatalytic hydrogen evolution.

**Table. S2.** The Bader charge and free energy of H atom adsorbing on different Ni sites of cocatalysts.

|                                | Bader charge | $\Delta GH^*$ |
|--------------------------------|--------------|---------------|
| TiO <sub>2</sub> -Ni-MOL-100   | 1.406        | -0.1512       |
| TiO <sub>2</sub> -Ni-MOL-100-2 | 1.220        | 0.2568        |
| TiO <sub>2</sub> -Ni-MOL-010   | 0.9781       | 1.207         |

## References

1. Z. Li, J.-D. Xiao and H.-L. Jiang, Encapsulating a Co (II) molecular photocatalyst in metal-organic framework for visible-light-driven H<sub>2</sub> production: Boosting catalytic efficiency via spatial charge separation, *ACS Catal.*, 2016, **6**, 5359-5365.
2. D. Sun, W. Liu, Y. Fu, Z. Fang, F. Sun, X. Fu, Y. Zhang and Z. Li, Noble metals can have different effects on photocatalysis over metal-organic frameworks (MOFs): a case study on M/NH<sub>2</sub>-MIL-125 (Ti)(M= Pt and Au), *Chem. Eur. J.* 2014, **20**, 4780-4788.
3. Y. Su, Z. Zhang, H. Liu and Y. Wang, Cd<sub>0.2</sub>Zn<sub>0.8</sub>S@UiO-66-NH<sub>2</sub> nanocomposites as efficient and stable visible-light-driven photocatalyst for H<sub>2</sub> evolution and CO<sub>2</sub> reduction, *Appl. Catal. B: Environ.*, 2017, **200**, 448-457.
4. J. He, Z. Yan, J. Wang, J. Xie, L. Jiang, Y. Shi, F. Yuan, F. Yu and Y. Sun, Significantly enhanced photocatalytic hydrogen evolution under visible light over CdS embedded on metal-organic frameworks, *Chem. Commun.*, 2013, **49**, 6761-6763.

5. S. Yang, B. Pattengale, E.-L. Kovrigin and J. Huang, Photoactive zeolitic imidazolate framework as intrinsic heterogeneous catalysts for light-driven hydrogen generation, *ACS Energy Lett.*, 2017, **2**, 75-80.
6. J.-D. Xiao, Q. Shang, Y. Xiong, Q. Zhang, Y. Luo, S.-H. Yu and H.-L. Jiang, Boosting photocatalytic hydrogen production of a metal-organic framework decorated with platinum nanoparticles: The platinum location matters, *Angew. Chem. Int. Ed.*, 2016, **55**, 9389-9393.
7. F. Guo, J.-H. Guo, P. Wang, Y.-S. Kang, Y. Liu, J. Zhao and W.-Y. Sun, Facet-dependent photocatalytic hydrogen production of metal-organic framework NH<sub>2</sub>-MIL-125 (Ti), *Chem. Sci.*, 2019, **10**, 4834-4838.
